# Supplementary figures and images for: Hydrogen inhalation ameliorates ventilator-induced lung injury
Source: Springer Nature journal article supplement (doi:10.1186/cc9389), 2010-12-25

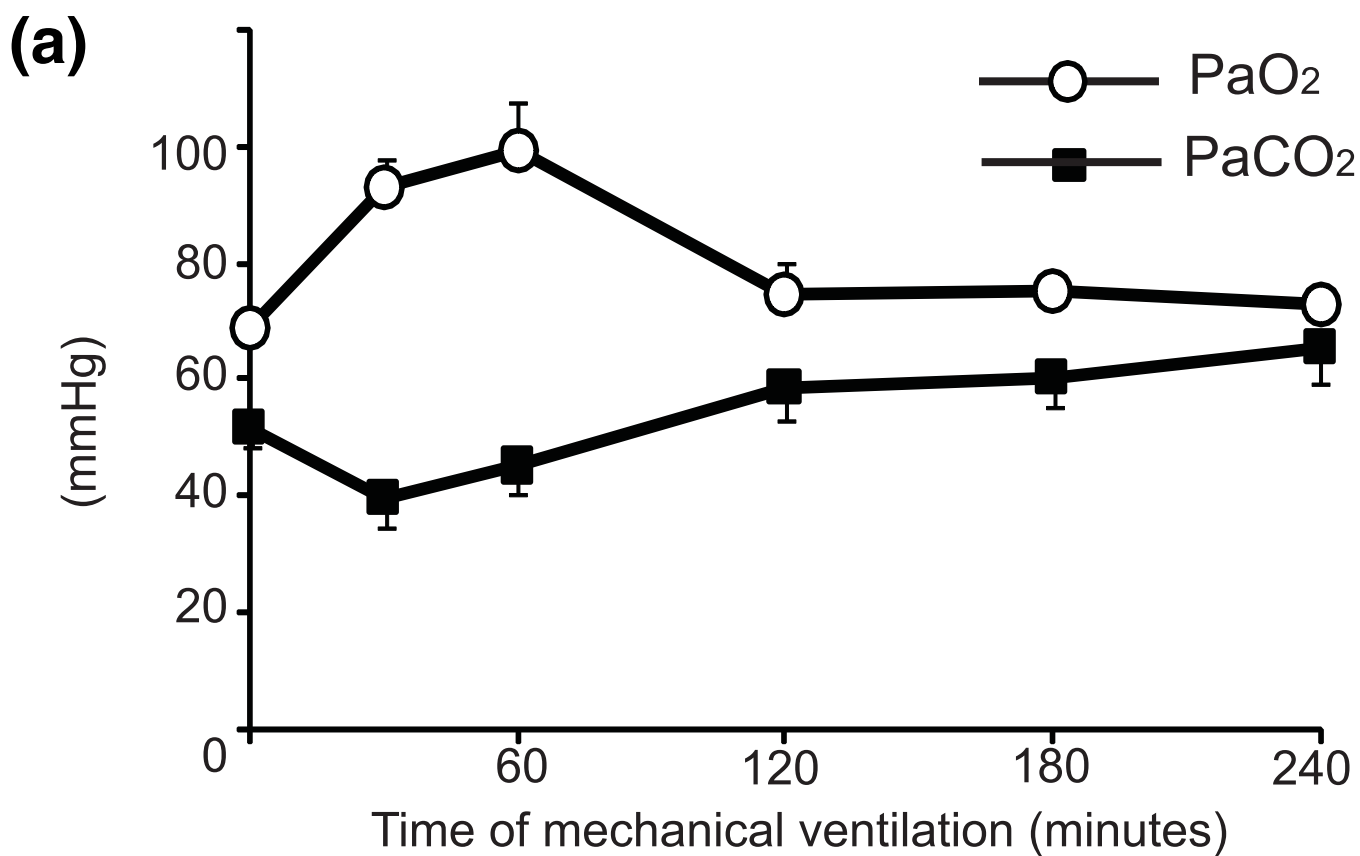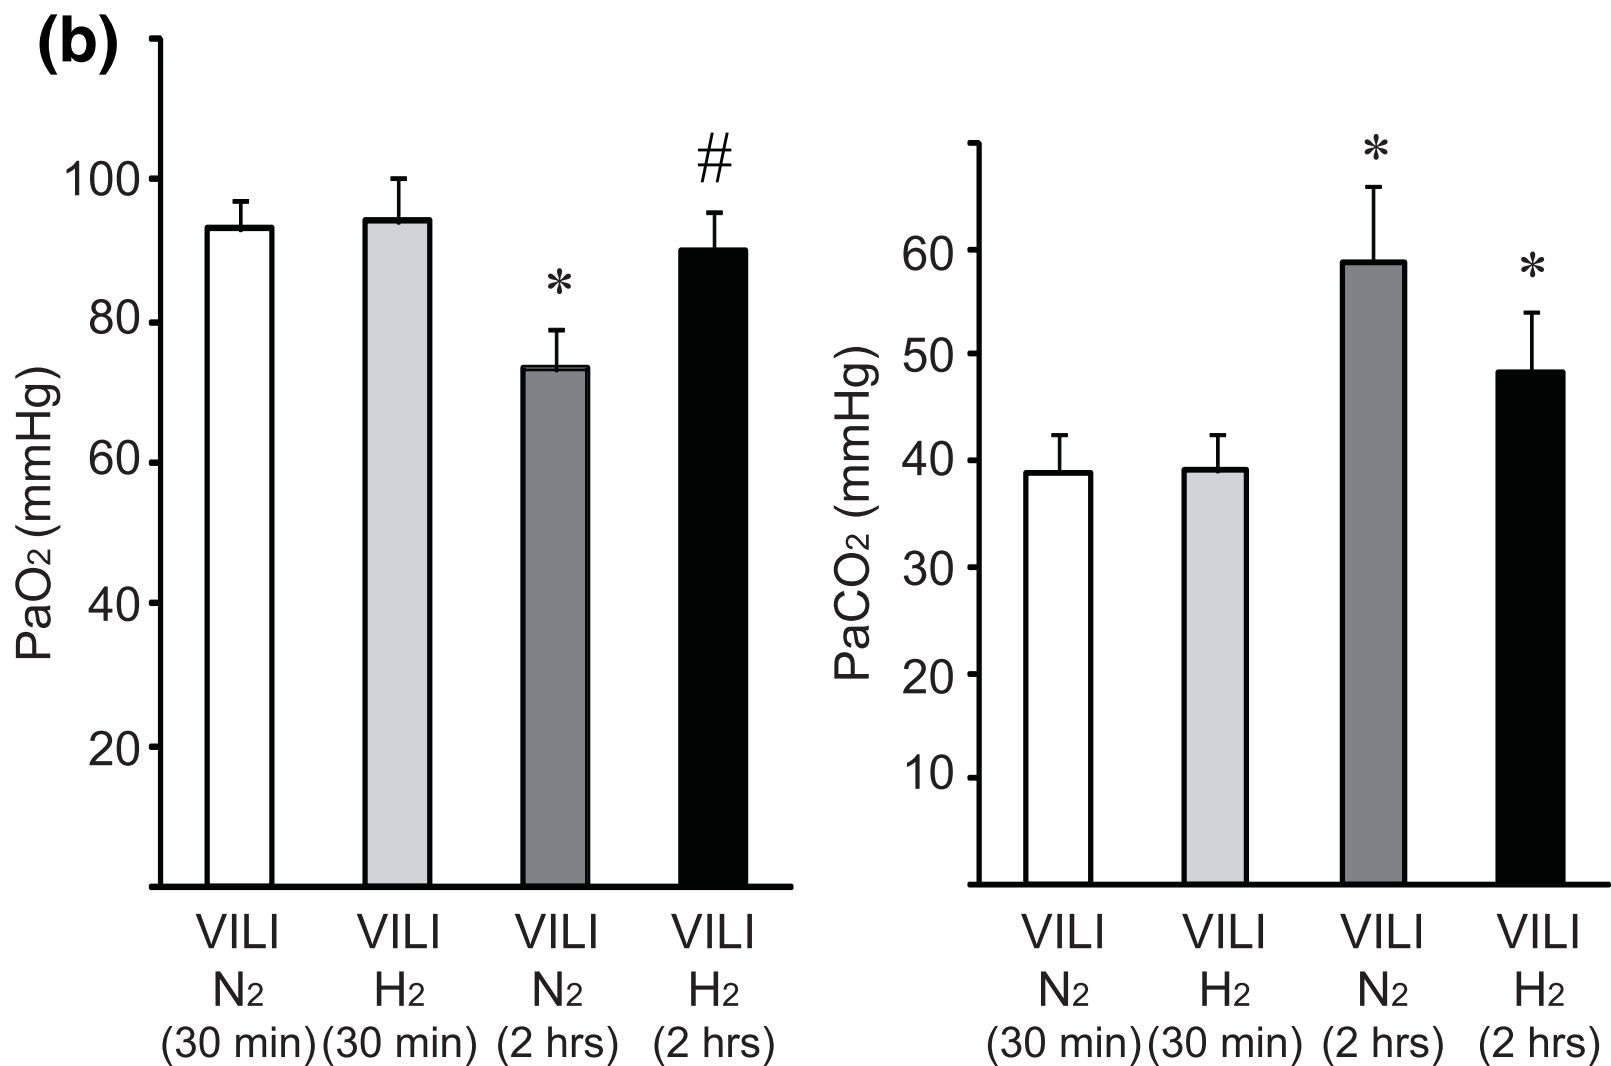

Supplement: 13054_2010_8857_MOESM1_ESM.pdf [file 13054_2010_8857_MOESM1_ESM.pdf]

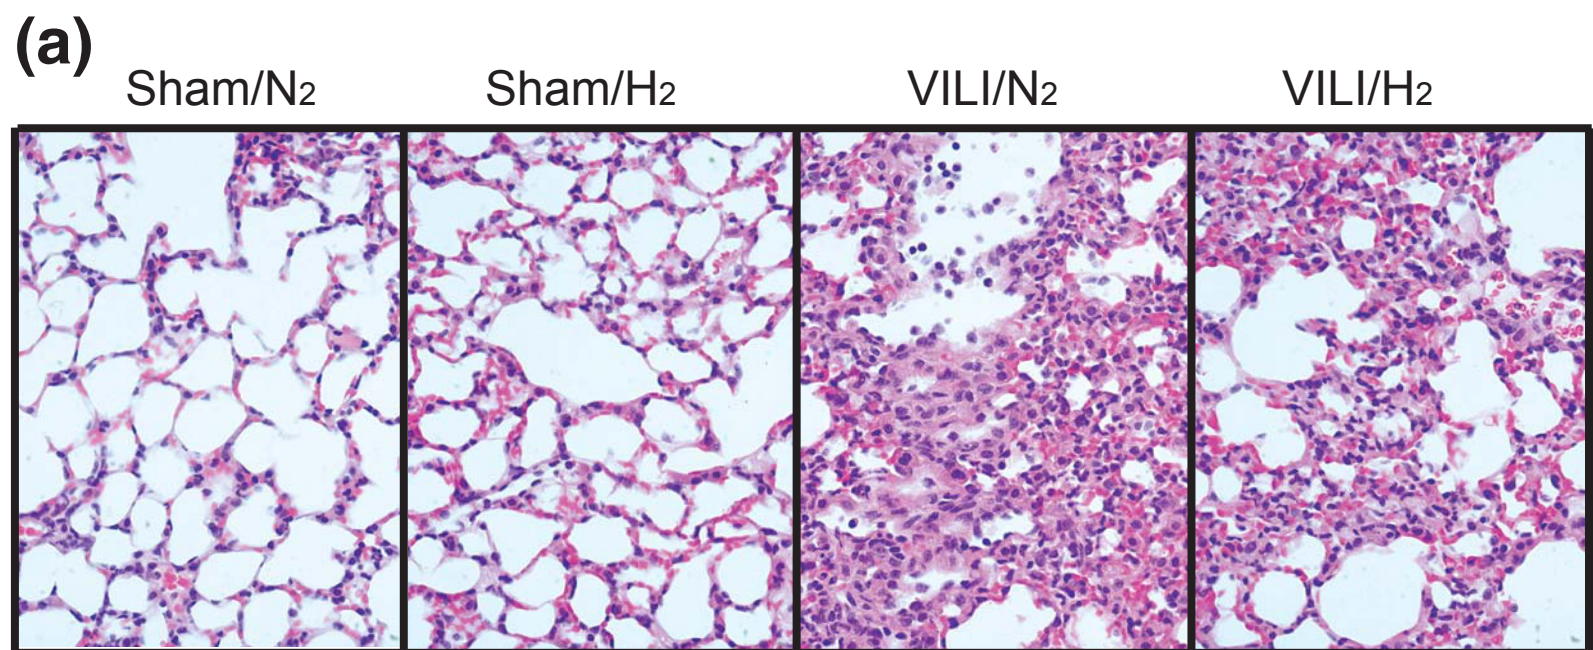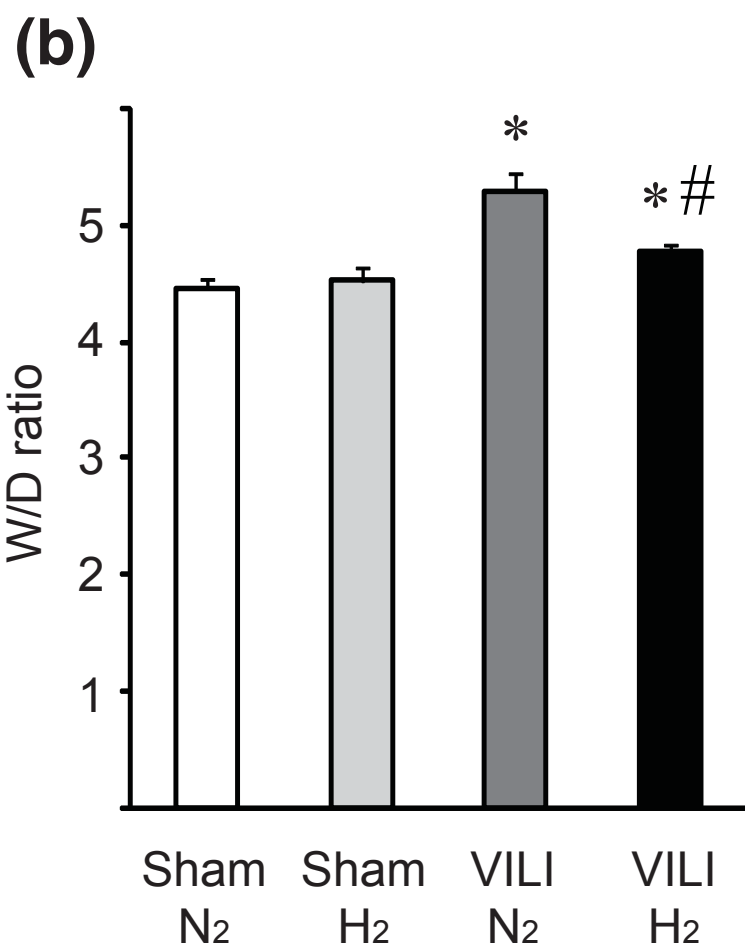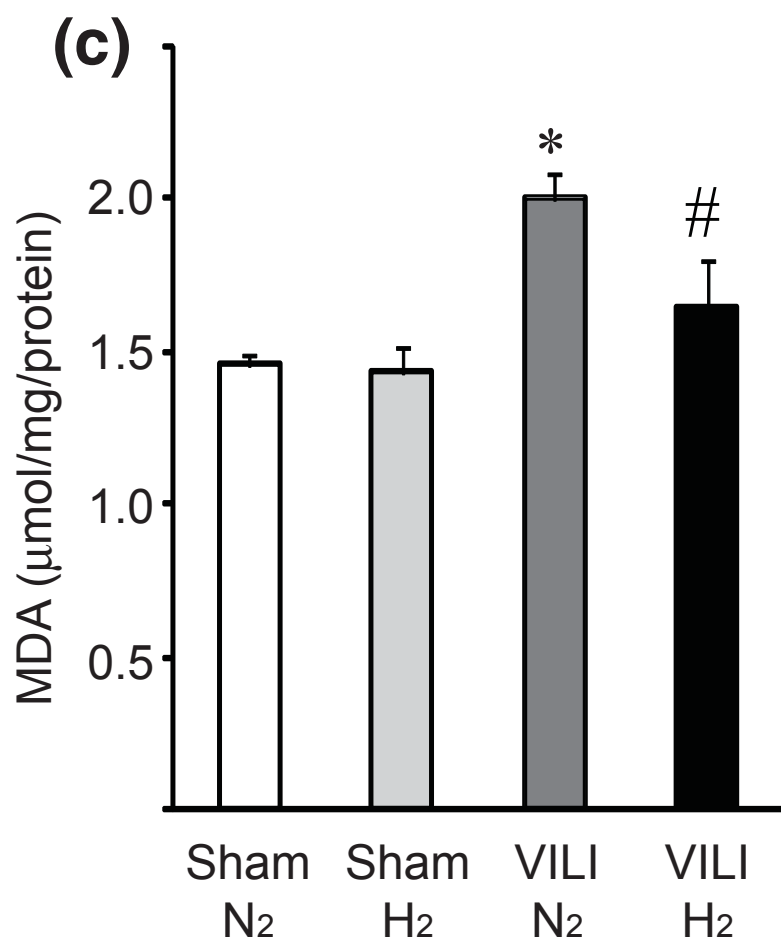

Supplement: 13054_2010_8857_MOESM2_ESM.pdf [file 13054_2010_8857_MOESM2_ESM.pdf]

**(a)**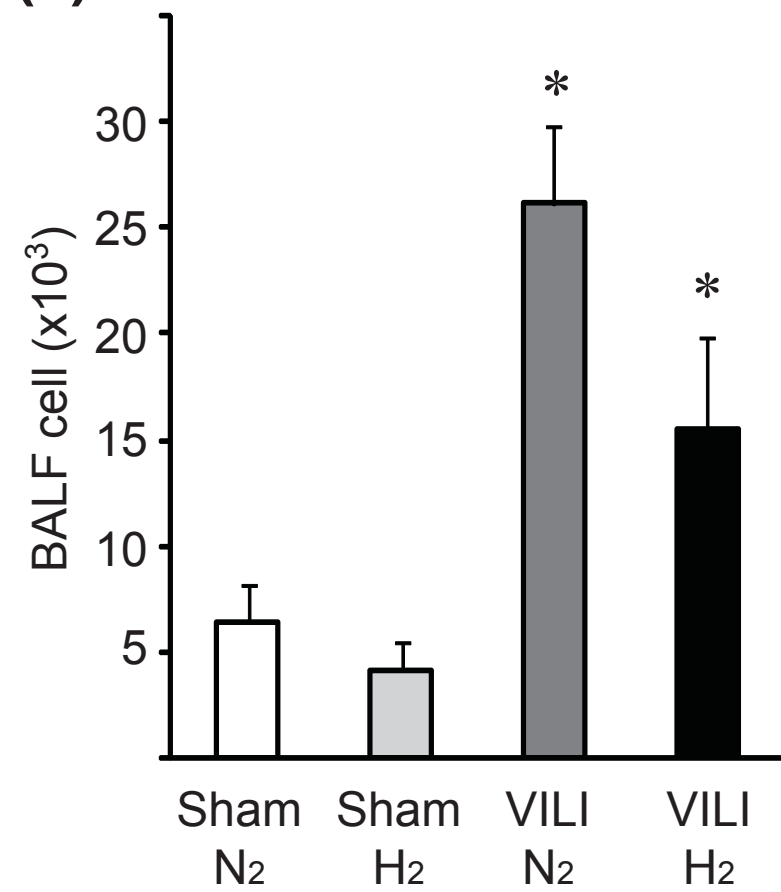**(b)**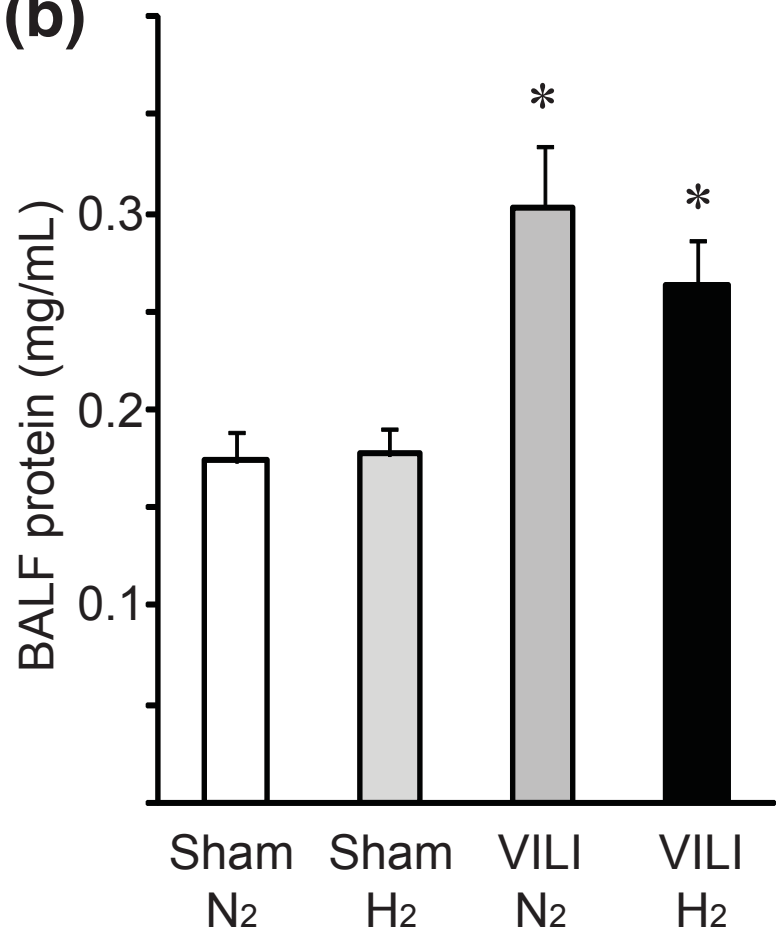**(c)**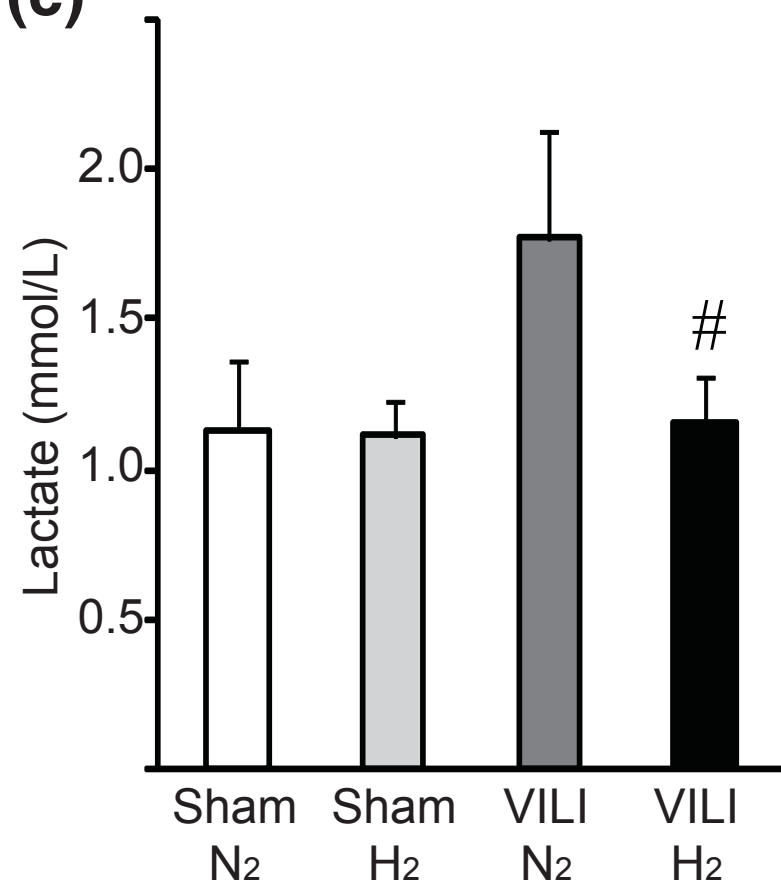

Supplement: 13054_2010_8857_MOESM3_ESM.pdf [file 13054_2010_8857_MOESM3_ESM.pdf]

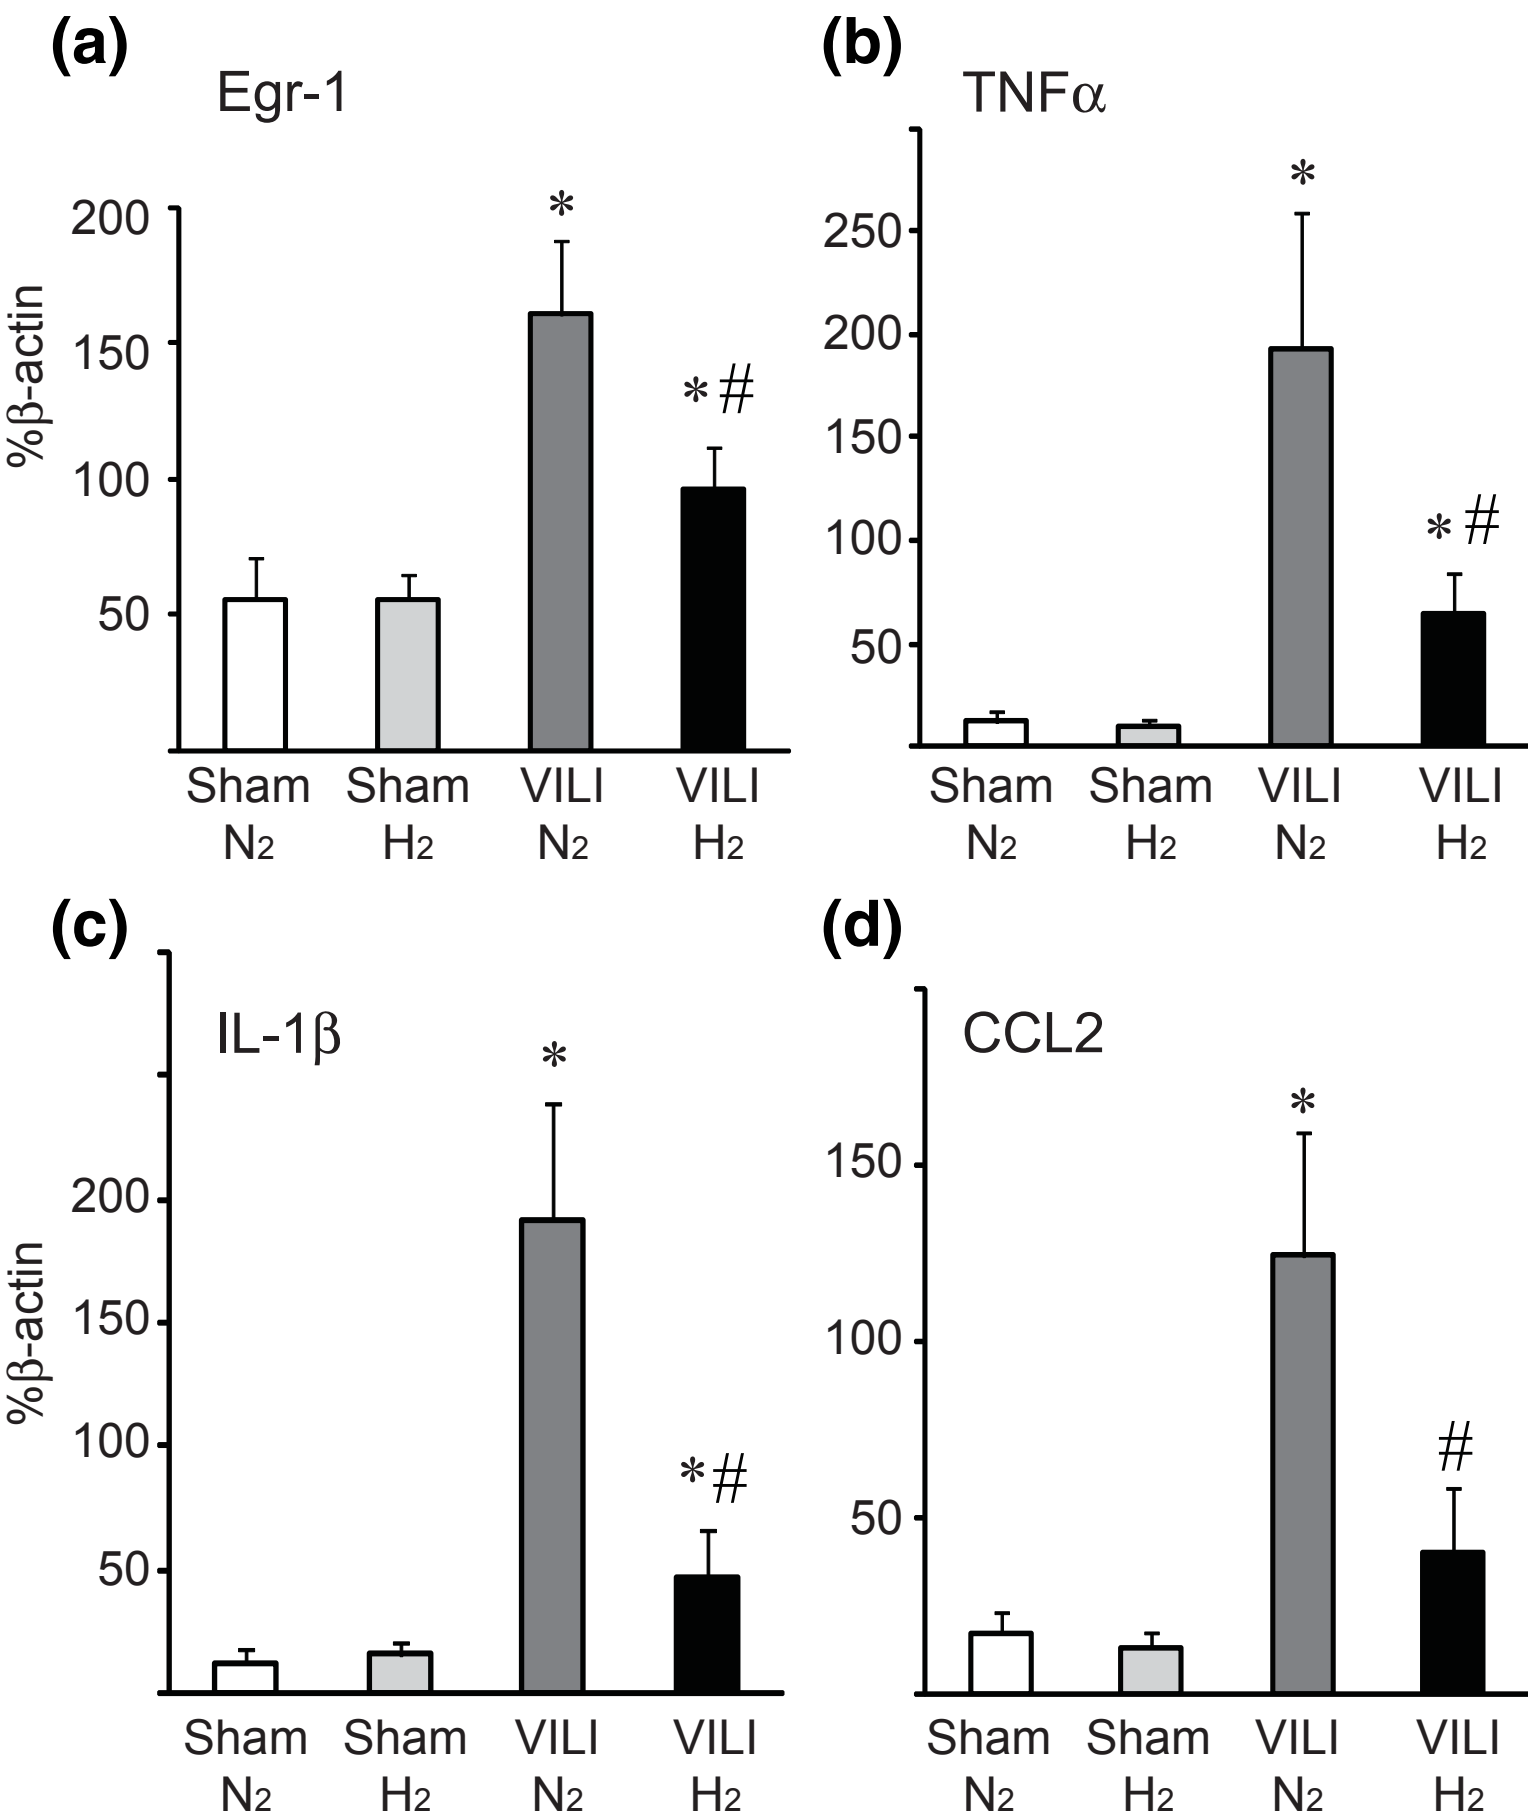

Supplement: 13054_2010_8857_MOESM4_ESM.pdf [file 13054_2010_8857_MOESM4_ESM.pdf]

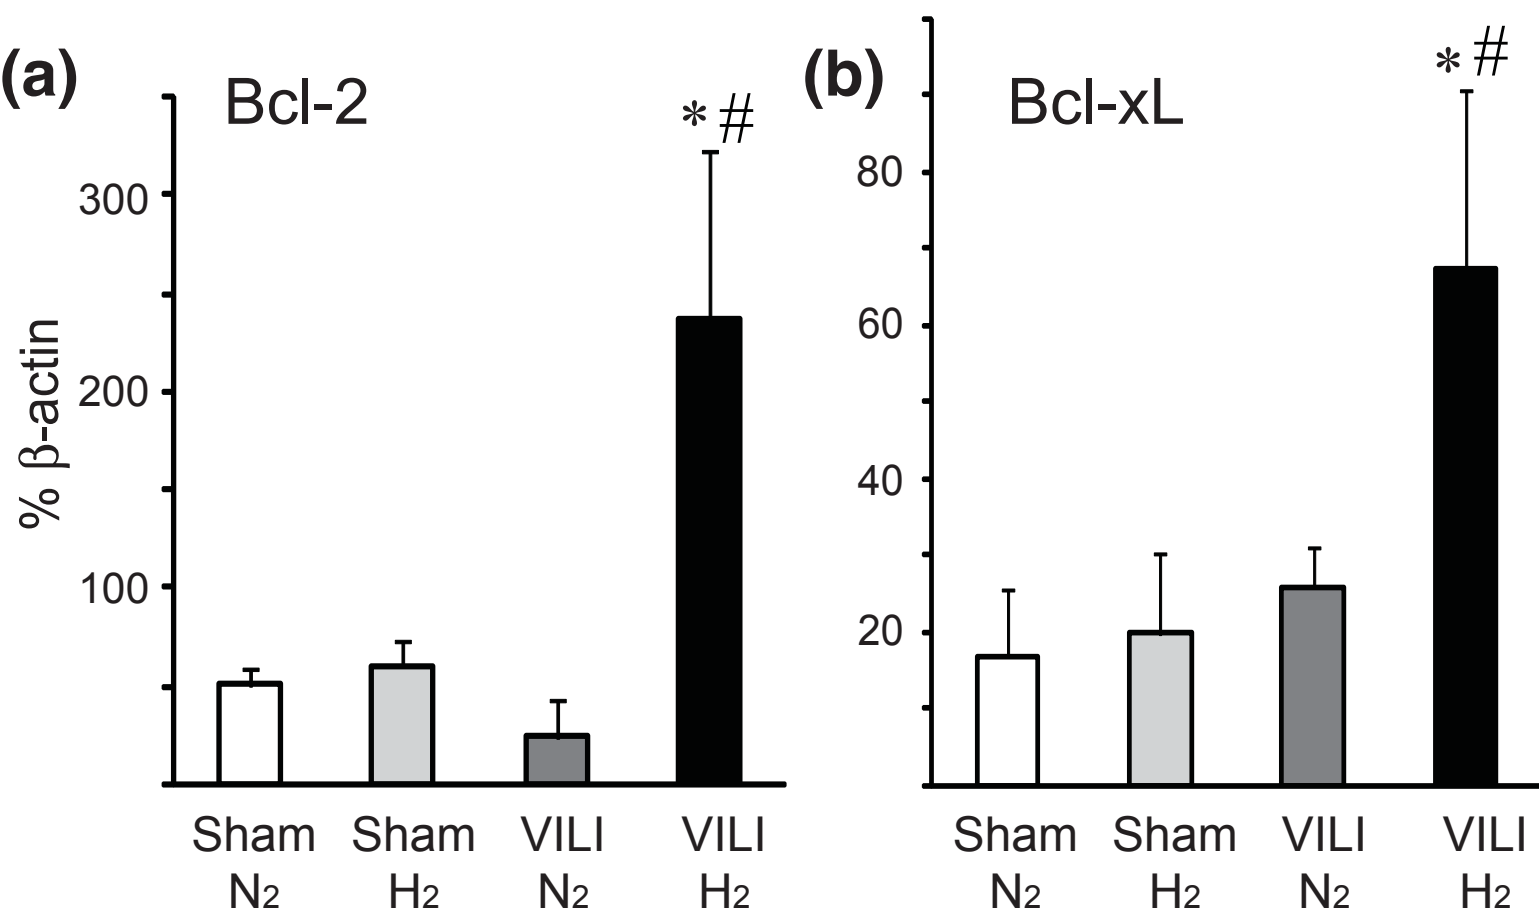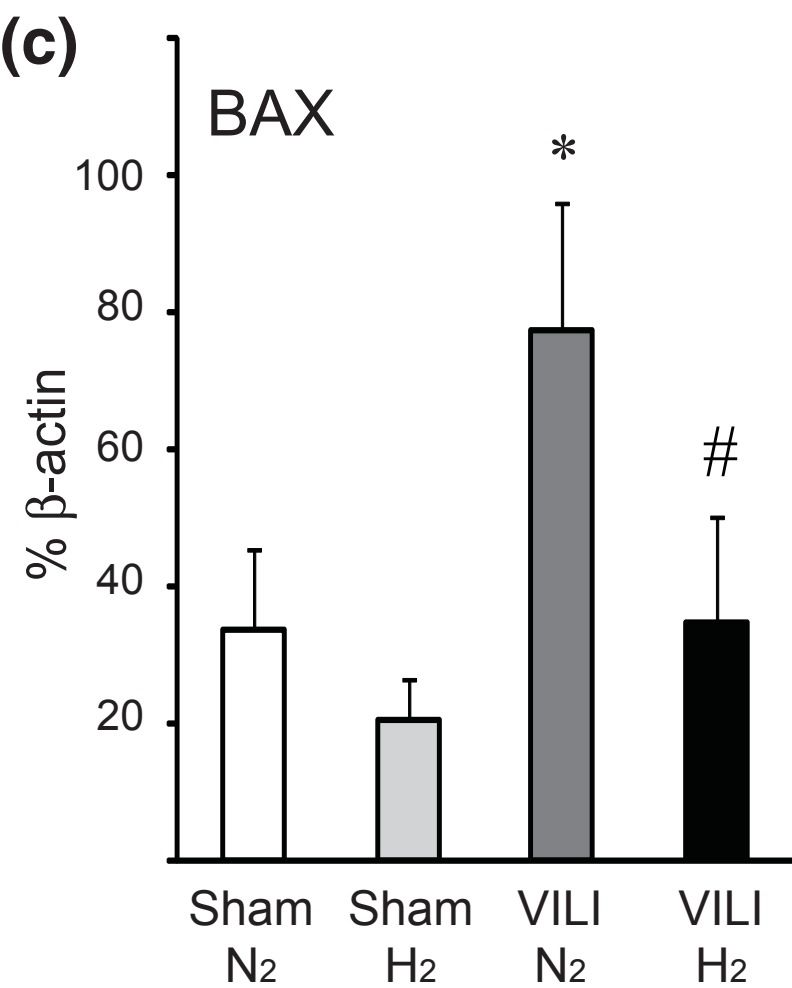

Supplement: 13054_2010_8857_MOESM5_ESM.pdf [file 13054_2010_8857_MOESM5_ESM.pdf]

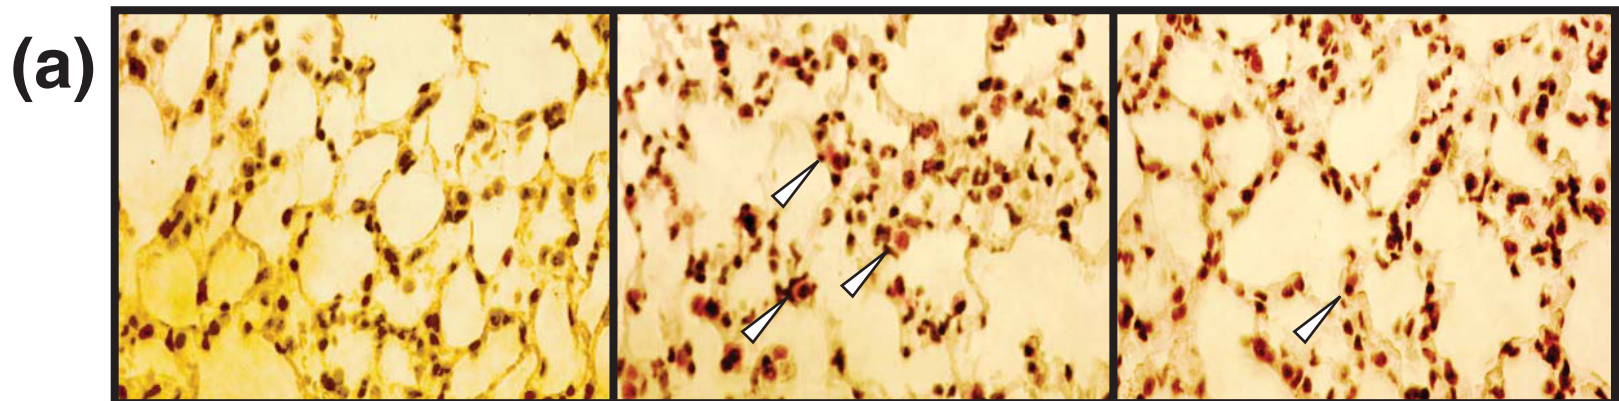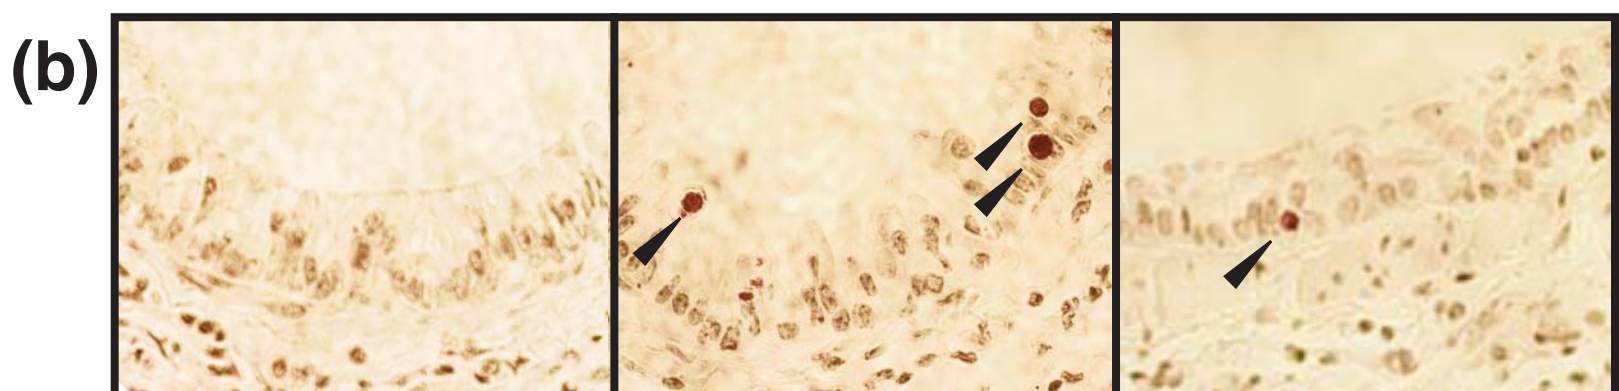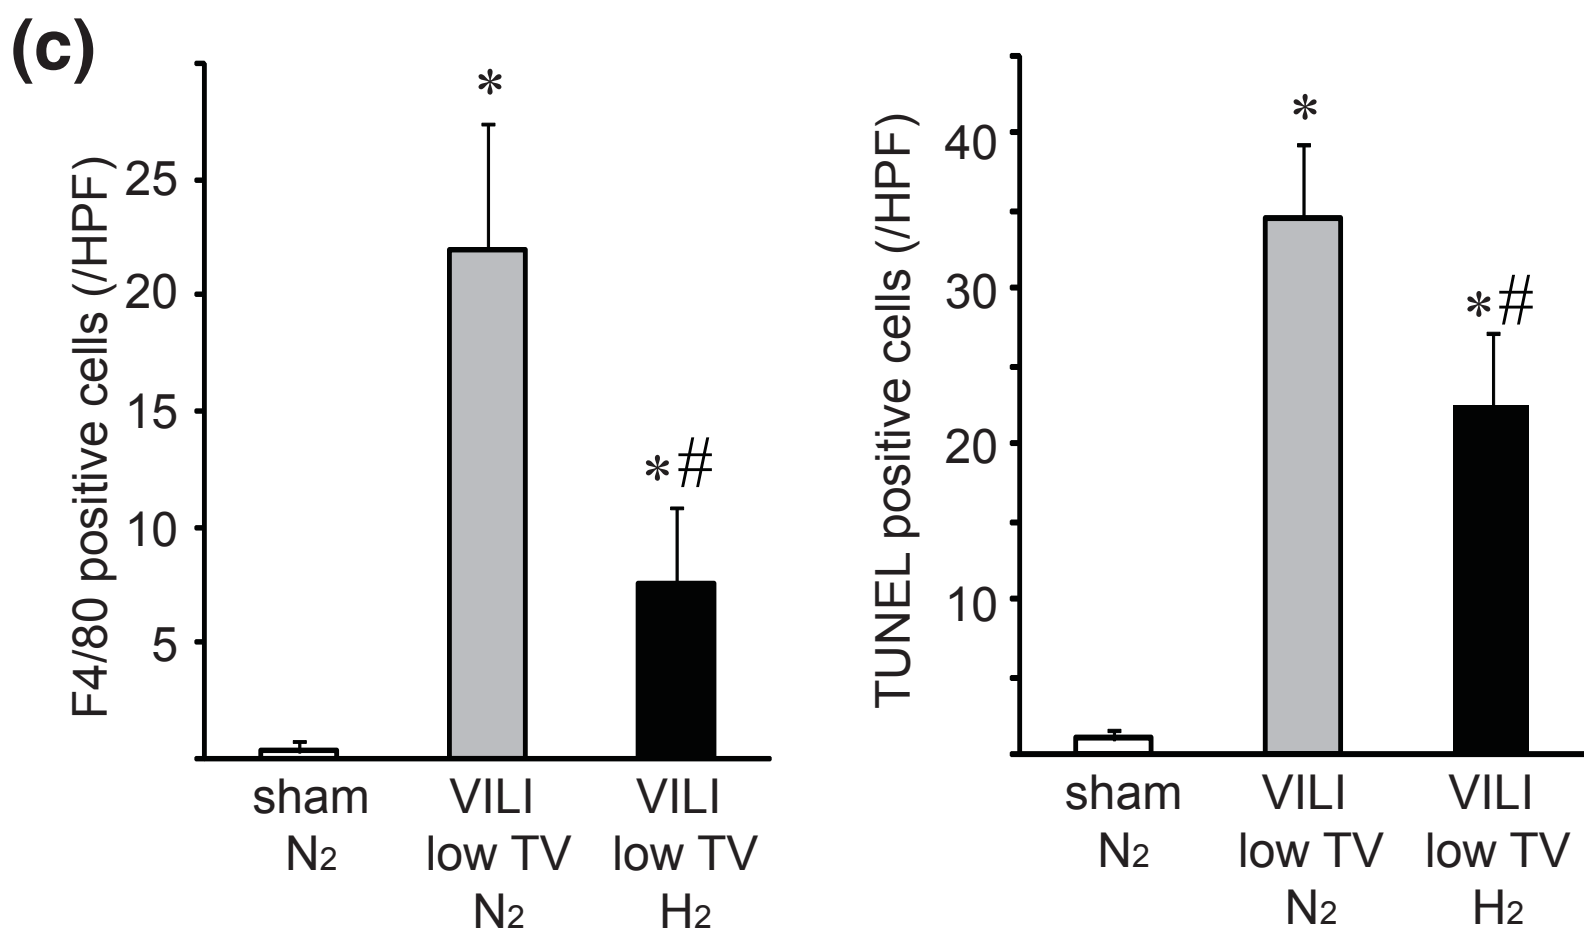

Supplement: 13054_2010_8857_MOESM7_ESM.pdf [file 13054_2010_8857_MOESM7_ESM.pdf]
